# Supplementary material
Source: publisher figshare collection journal article supplement (https://gsajournals.figshare.com/articles/dataset/_/8288591)
Supplement: Supplementary file 1 [file 1]

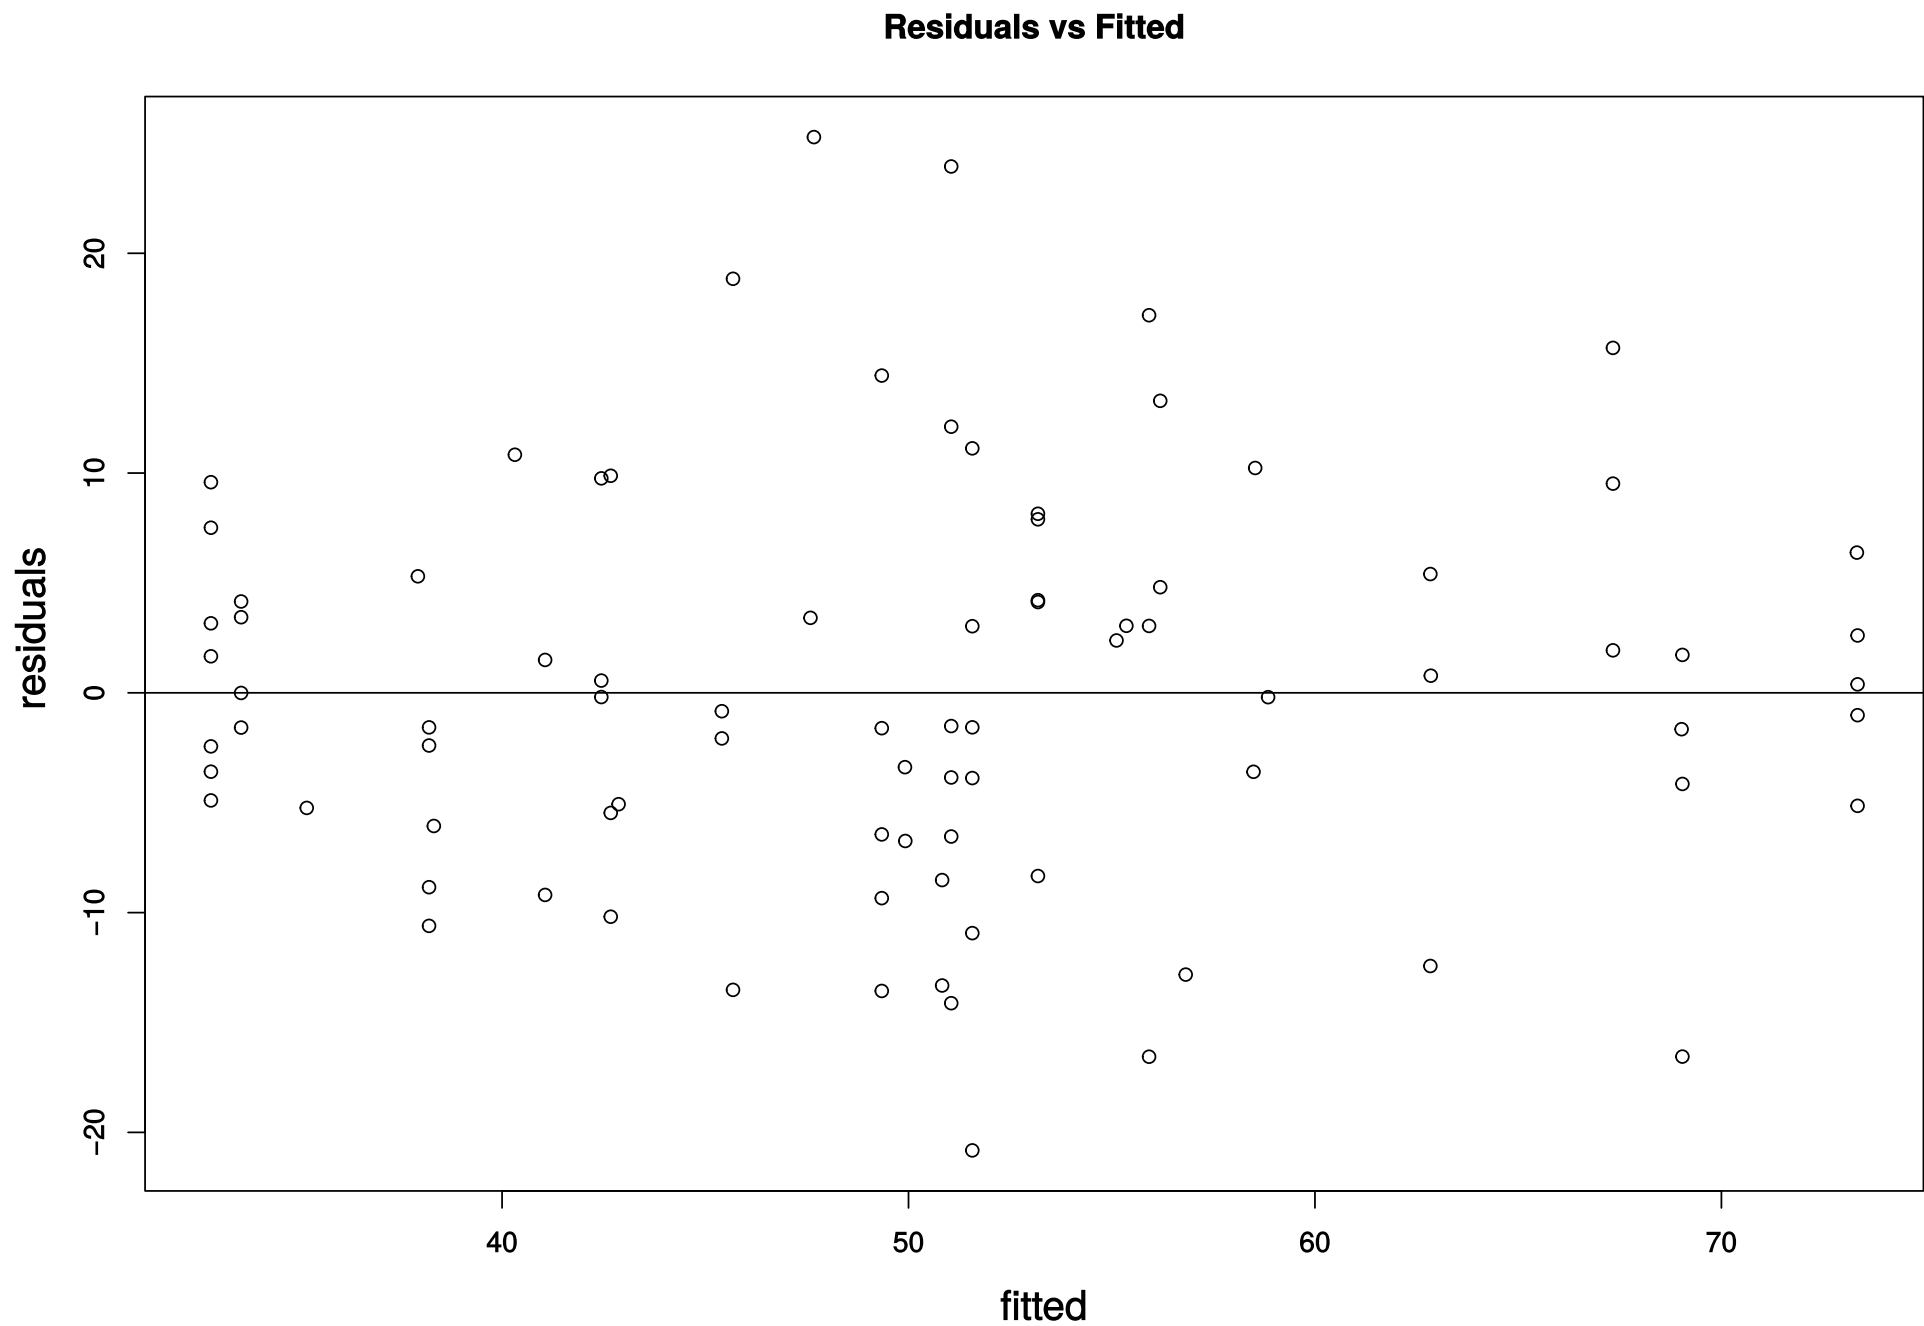

**Figure S2.** Residuals versus fitted plot of the multiple QTL model  $y \sim \text{QTL1} + \text{QTL2} + \text{QTL3} + \text{QTL2}:\text{QTL3}$ . The plot suggests that there were no apparent problems with the model fit, such as non-constant variance or outliers. The overall fit of the model was good (LOD score of 19.26).
