# Supplementary material
Source: publisher figshare collection journal article supplement (https://gsajournals.figshare.com/articles/dataset/_/8288591)
Supplement: Supplementary file 2 [file 1]

A)

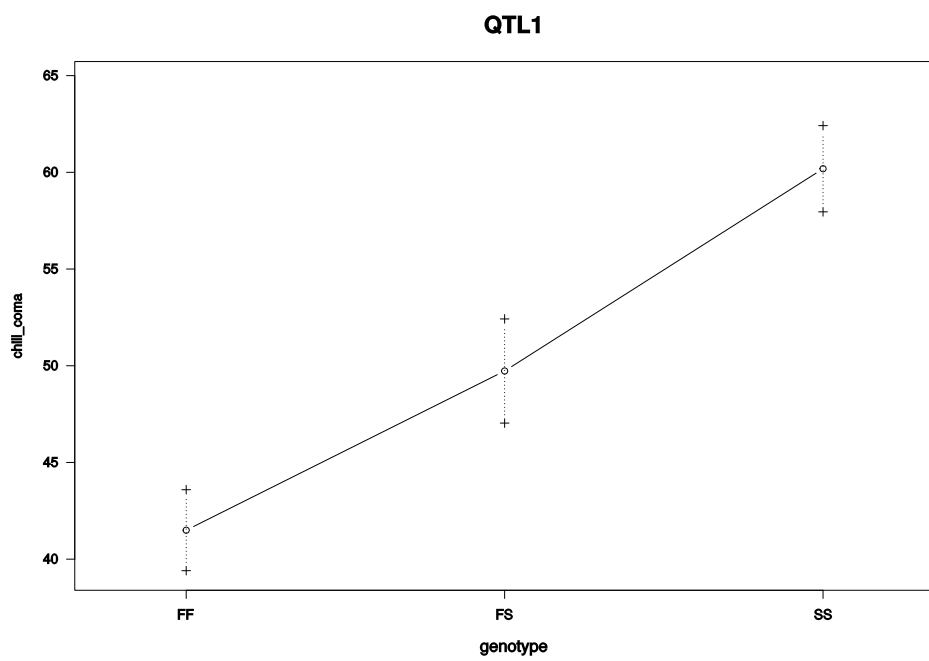

B)

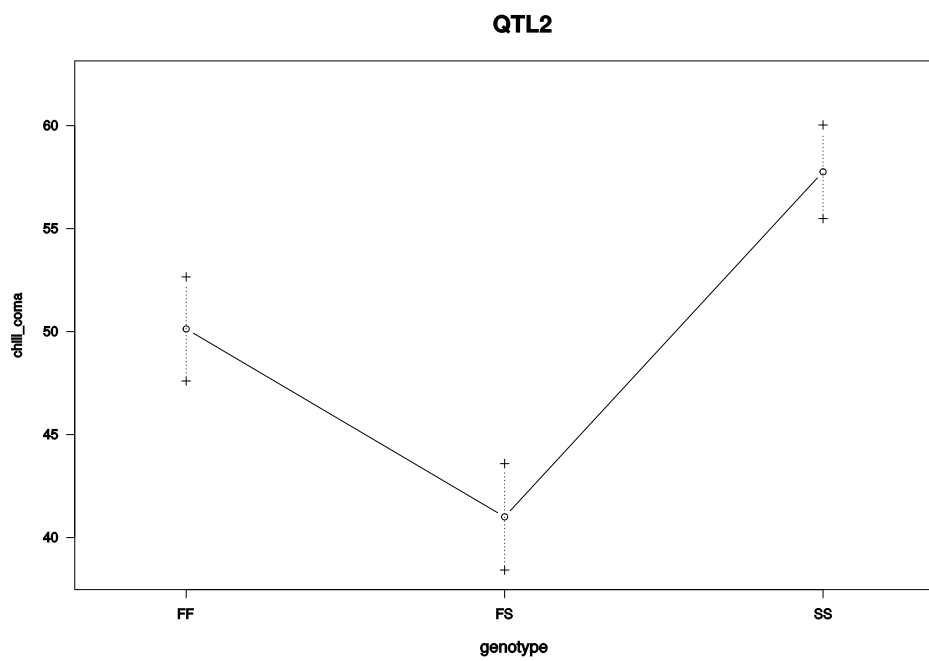

C)

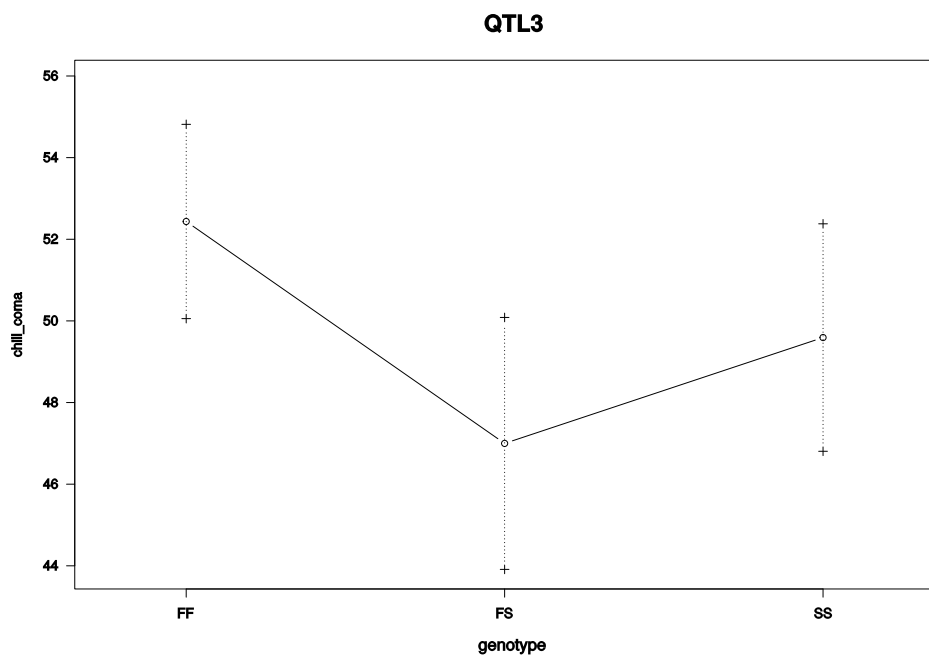

**Figure S1.** Effectplots for QTL1 (A), QTL2 (B) and QTL3 (C). Error bars are plotted at  $\pm 1$  SE. F = cold-tolerant parental allele (fast CCR), S = cold-sensitive parental allele (slow CCR).
