# Supplementary material
Source: publisher figshare collection journal article supplement (https://gsajournals.figshare.com/articles/dataset/_/8288591)
Supplement: Supplementary file 3 [file 1]

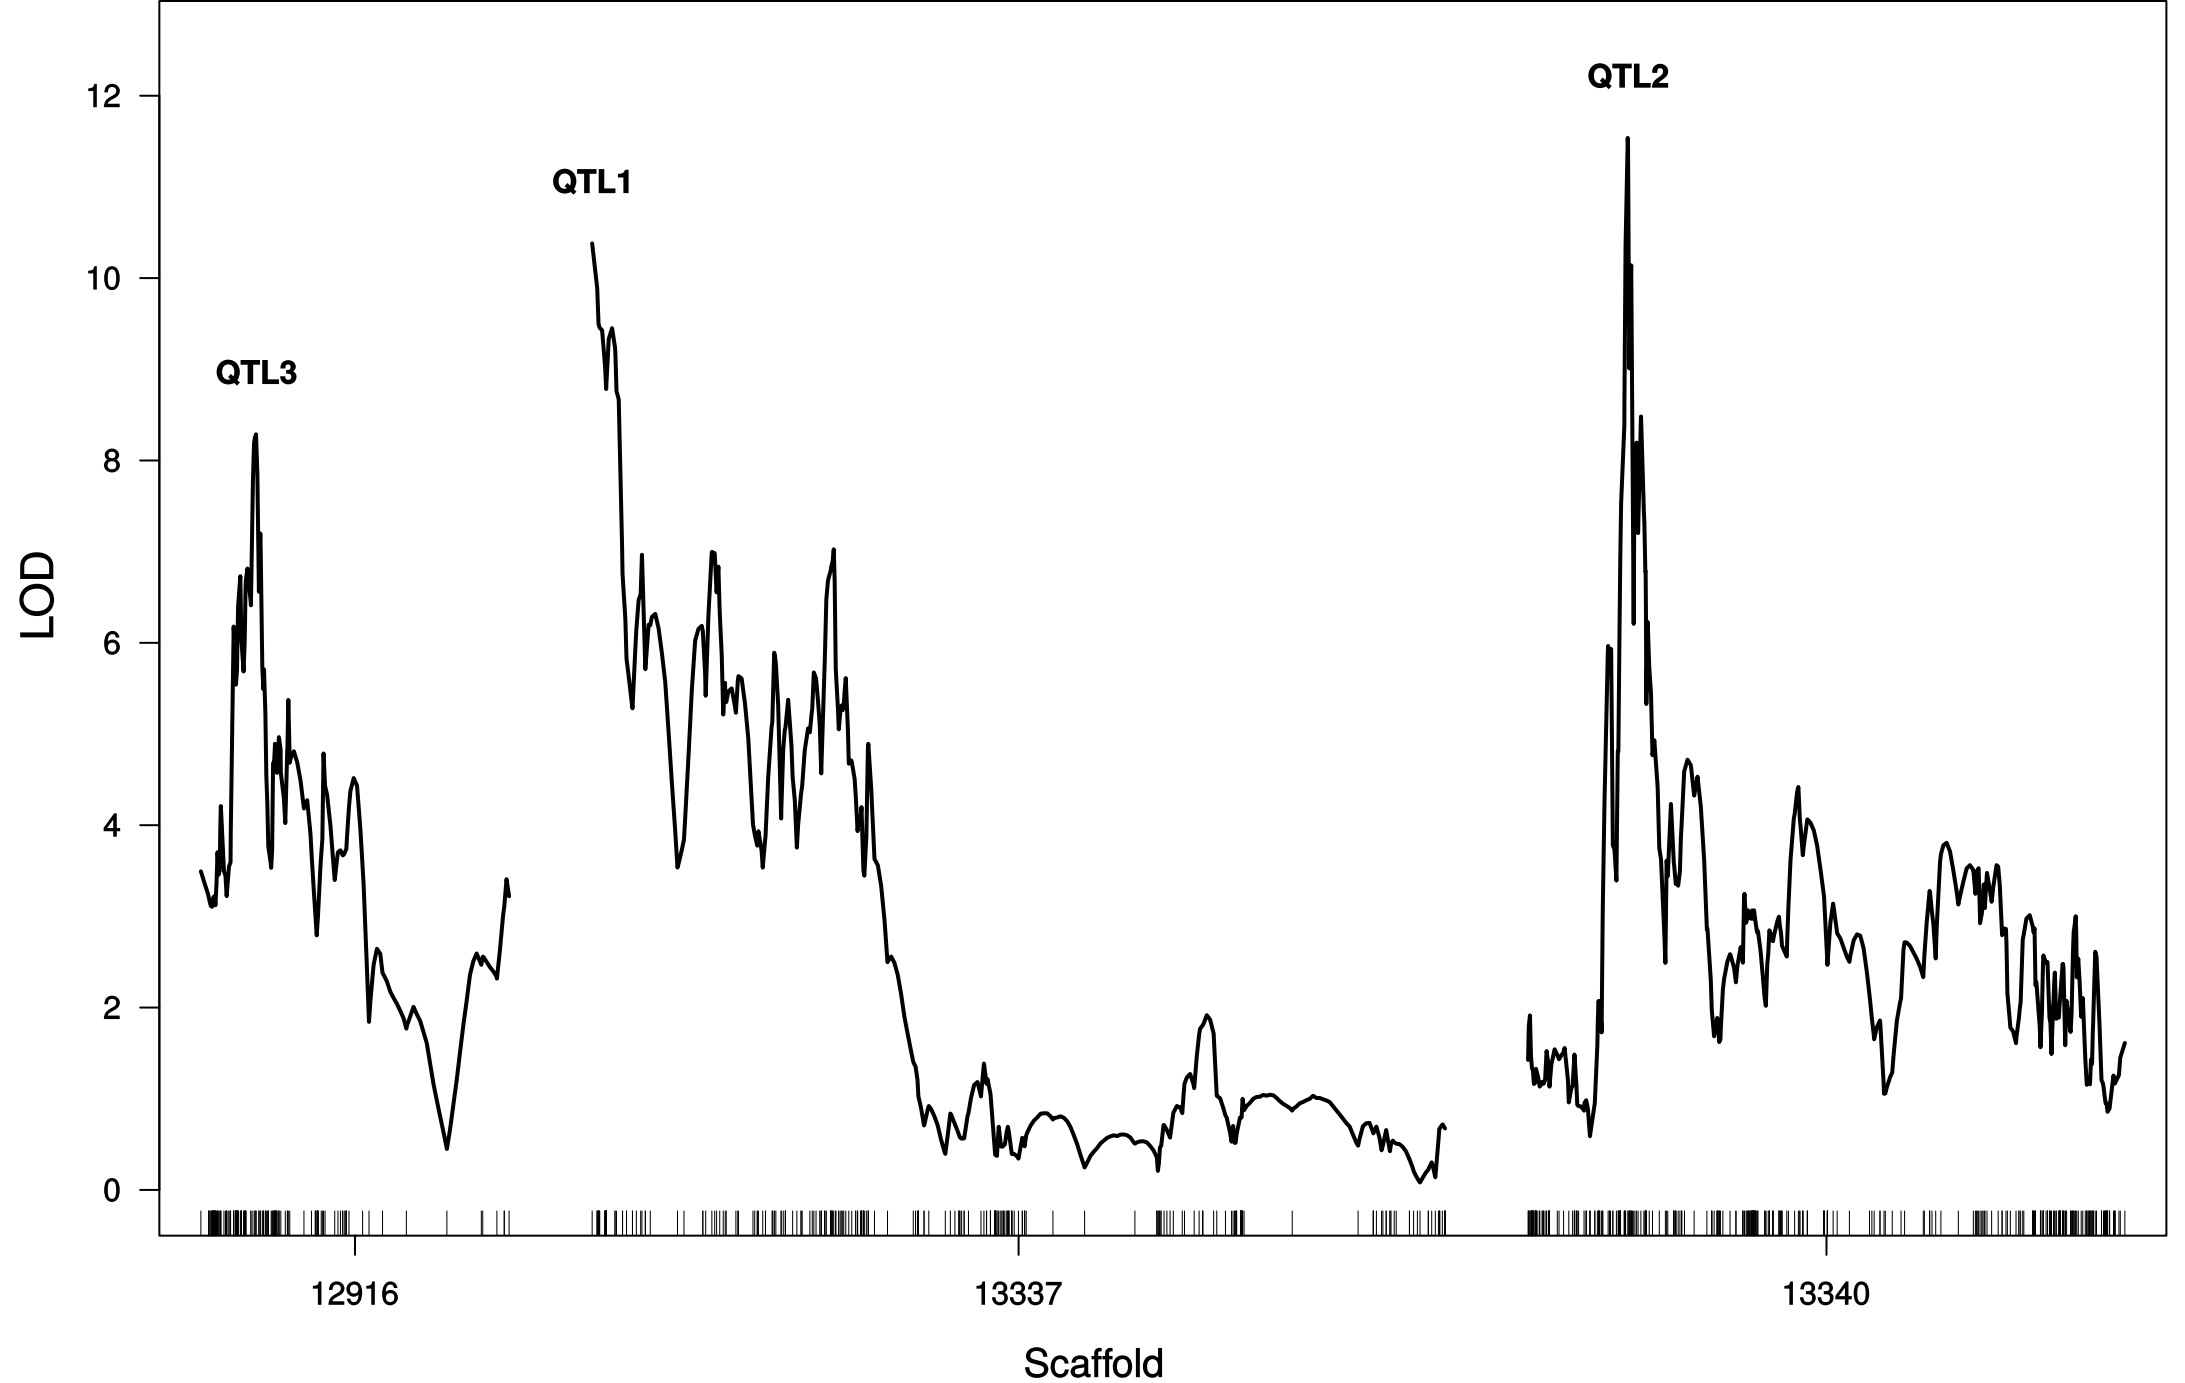

**Figure S3.** Profile LOD scores for the multiple-QTL model. LOD scores are calculated from the drop-one-at a time ANOVA (Table 3). The short vertical lines on the X-axis correspond to the marker positions. Scaffold numbers correspond to the *D. ananassae* reference genome (FlyBase release 1.05 (Attrill et al., 2016)).
